# Supplementary material
Source: publisher figshare collection journal article supplement (https://acs.figshare.com/ndownloader/files/4049704)
Supplement: Supplementary file 1 [file 4049704]

# CuH-ZSM-5 as Hydrocarbon Trap under cold start conditions

*M. Navlani-García<sup>a</sup>, B. Puértolas<sup>b</sup>, D. Lozano-Castelló<sup>a</sup>, \*, D. Cazorla-Amorós<sup>a</sup>, M. V.  
Navarro<sup>b</sup>, T. García<sup>b</sup>*

<sup>a</sup> Instituto Universitario de Materiales, Departamento de Química Inorgánica,  
Universidad de Alicante. Apartado 99, E-03080, Alicante, Spain, phone number: +34  
965 903 966, FAX number: +34 965 903 454

<sup>b</sup> Instituto de Carboquímica (ICB-CSIC), M Luesma Castán 4, 50015-Zaragoza, Spain,  
phone number: +34 976 733 977, FAX number: +34 976 733 318

Number of pages: 8

Number of Figures: 4

Number of Tables: 1

### *Sample characterization*

The samples were characterized by scanning electron microscope (SEM) in a HITACHI microscope (model S-3000N). Copper loading was determined by means of inductively coupled plasma-optical emission spectroscopy (ICP-OES), in a Perkin Elmer Optima 4300 system.  $\text{NH}_3$ -TPD profiles were obtained using a conventional flow-through reactor connected to a thermal conductivity detector (TCD). 100 mg of each zeolite were cleaned in flowing Ar at 500 °C for 6 h, and cooled down to 125 °C under vacuum. The samples were treated for 4 h with 1.3 kPa  $\text{NH}_3$ /Ar flow, and the weakly adsorbed  $\text{NH}_3$  was removed afterwards by 1 h evacuation at 125 °C. The  $\text{NH}_3$ -TPD profiles were finally obtained by heating the reactor at 5 °C/min up to 600 °C in 30 ml/min helium flow.

X-Ray photoelectron spectroscopy (XPS) was used to provide information on how copper is present in the sample and its oxidation state. The apparatus was an ESCA<sup>+</sup> (omicron) system equipped with a Mg K $\alpha$  radiation source to excite the sample ( $h\nu$  = 1253.6 eV). To obtain the XPS spectra, the pressure of the analysis chamber was maintained at 10<sup>-10</sup> mbar. The binding energy scale was adjusted by setting the C1s transition at 284.5 eV.

The textural characterization of the zeolites was carried out by means of the adsorption of  $\text{N}_2$  at -196 °C (Autosorb 6, Quantachrome). Prior to the adsorption measurements, the adsorbent particles were outgassed in situ in vacuum (4 mbar) at 250 °C for 4 h to remove any adsorbed impurities. Surface area was calculated from nitrogen adsorption isotherms using the BET equation ( $S_{\text{BET}}$ ). Total micropore volume ( $V_{\text{DR}}(\text{N}_2)$ ) was calculated applying the Dubinin–Radushkevich (DR) equation to the  $\text{N}_2$  adsorption data at -196 °C.

Solids prepared were characterized by X-ray diffraction (XRD), using a SEIFERT 2002 power diffractometer with a Cu-K $\alpha$  radiation. The scanning rate was 2°/min in the 5-50° angle.

The morphology and crystal sizes were examined by transmission electron microscopy (TEM) in a JOEL (JEM-2010) microscope.

A FTIR spectrometer (model Infinity MI60 from Mattson) with a diffuse reflectance accessory (model COLLECTOR from Spectra Tech) was used for in situ DRIFTS experiments. An IR cell fitted with CaF<sub>2</sub> windows, which allowed temperature and gas flow composition control, was used. The gas composition was monitored during the experiments with a mass spectrometer Pfeiffer Vacuum (model OmniStar). Before starting the experiments in presence of propene, the samples were treated in an inert atmosphere (He) at 350 °C for 30 min, in order to remove any adsorbed impurities. Then propene adsorption was carried out at room temperature and, finally, samples were heated up to 350 °C at 20 °C/min in a helium atmosphere to cause propene desorption. The gas flow used was 35 ml/min and the propene concentration was 8000 ppm.

The amount of coke formed during the CST experiments was determined by the Thermal Gravimetric Analysis (TGA; TA Instruments, model SDT 2960) for samples H-ZSM-5, CuH-ZSM-5(1), CuH-ZSM-5(2) and CuH-ZSM-5(3), after being used. In these experiments, approximately 10 mg of the zeolite were used and the temperature was increased from 25 to 950 °C, with a heating rate of 10 °C/min under a constant flow rate of 80 ml/min in Air.

**Figure S1.** XRD diffractograms of the samples H-ZSM-5 and CuH-ZSM-5.

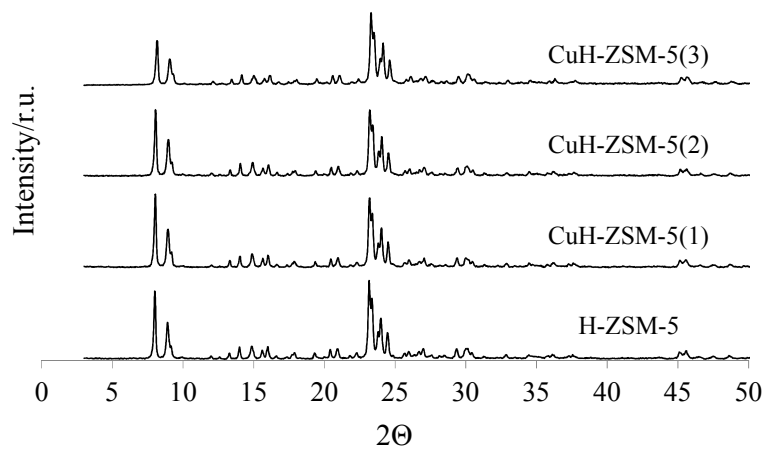

**Figure S2.**  $\text{NH}_3$ -TPD profiles of the samples H-ZSM-5 and CuH-ZSM-5.

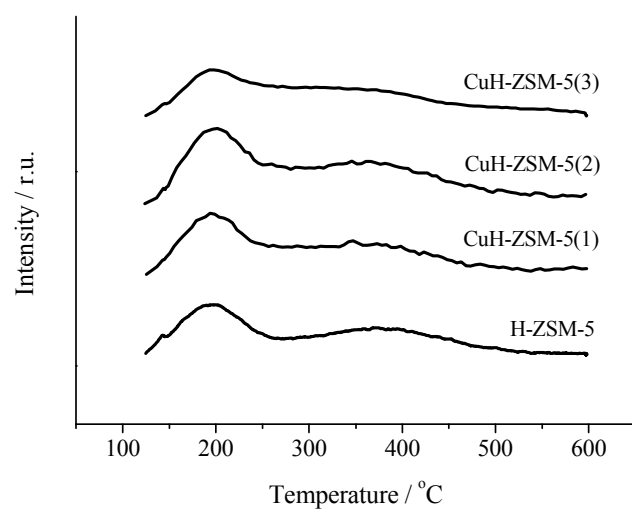

**Figure S3.** CST performed with the parent H-ZSM-5 zeolite. Conditions: 100 ppmv propene, 90 ppmv toluene, 1% v/v O<sub>2</sub>, 10% v/v H<sub>2</sub>O and Ar balance. GHSV = 10000 h<sup>-1</sup>. Red lines represent propene concentration profiles and black lines represent toluene. Straight lines represent the first cycle and dotted lines represent the third cycle.

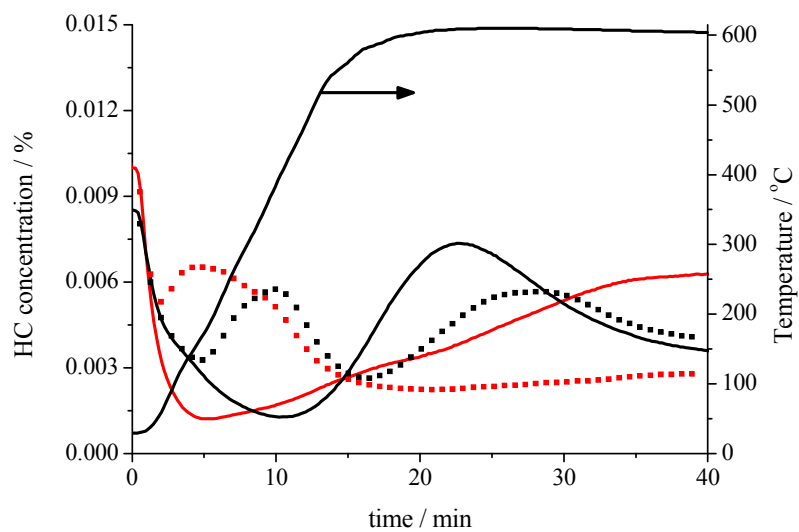

**Figure S4.** Simulated cold start test for the different zeolites, CO<sub>2</sub> evolution during the third CST. Conditions: 100 ppmv propene, 90 ppmv toluene, 1% v/v O<sub>2</sub>, 10% v/v H<sub>2</sub>O and Ar balance. GHSV= 10000 h<sup>-1</sup>. Black line represents H-ZSM-5 CO<sub>2</sub> concentration profile, red represents CuH-ZSM-5(1), black dotted line presents CuH-ZSM-5(2) and red dotted line represents CuH-ZSM-5(3).

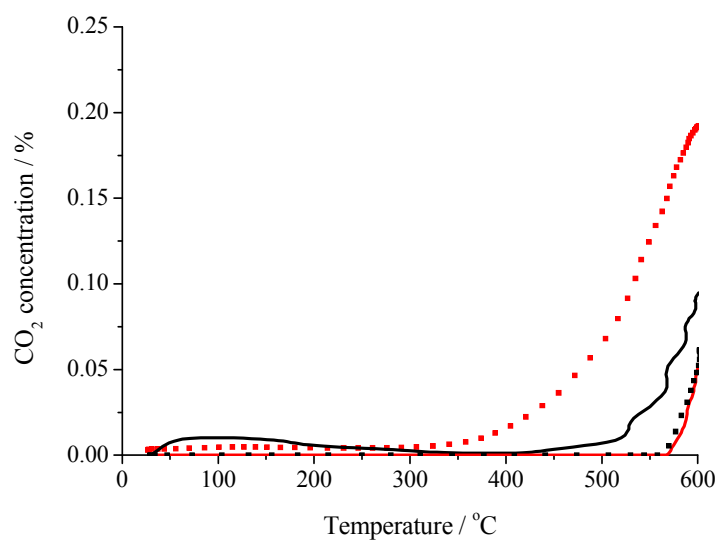

**Table S1.** Ion-exchange conditions.

| Sample       | Cu <sup>2+</sup> concentration (M) | Temperature (°C) | Time (h) |
|--------------|------------------------------------|------------------|----------|
| CuH-ZSM-5(1) | 3.45 x 10 <sup>-3</sup>            | 77               | 18       |
| CuH-ZSM-5(2) | 3.45 x 10 <sup>-3</sup>            | 77               | 22       |
| CuH-ZSM-5(3) | 0.1                                | 40               | 13       |
